1 **Title: BOLD cerebrovascular reactivity MRI to identify tissue reperfusion failure after**  
2 **EVT in patients with LVO acute stroke**

3 **Authors:** Jacopo Bellomo, MD<sup>1,2</sup>; Martina Sebök, MD PhD<sup>1,2</sup>; Vittorio Stumpo, MD<sup>1,2</sup>;  
4 Christiaan HB van Niftrik, MD PhD<sup>1,2</sup>; Darja Meisterhans, BMed<sup>1,2</sup>; Marco Piccirelli, PhD<sup>2,3</sup>;  
5 Lars Michels, PhD<sup>2,3</sup>; Beno Reolon, BMed<sup>2,3</sup>; Tilman Schubert, MD<sup>2,3</sup>; Zsolt Kulcsar, MD<sup>2,3</sup>;  
6 Andreas R Luft, MD<sup>2,4,5</sup>; Susanne Wegener, MD<sup>2,4</sup>; Luca Regli, MD<sup>1,2</sup>; Jorn Fierstra, MD  
7 PhD<sup>1,2</sup>

8 **Affiliations:**

9 <sup>1</sup>Department of Neurosurgery, University Hospital Zurich, Zurich, Switzerland

10 <sup>2</sup>Clinical Neuroscience Center, University of Zurich and Swiss Federal Institute of  
11 Technology Zurich, Zurich, Switzerland

12 <sup>3</sup>Department of Neuroradiology, University Hospital Zurich, Zurich, Switzerland

13 <sup>4</sup>Department of Neurology, University Hospital Zurich, Zurich, Switzerland

14 <sup>5</sup>cereneo Center for Neurology and Rehabilitation, Vitznau, Switzerland

15

16 **Corresponding author: Jacopo Bellomo**

17 Department of Neurosurgery

18 University Hospital Zurich, Zurich, Switzerland

19 Frauenklinikstrasse 10, CH-8091 Zurich

20 Email: [jacopo.bellomo@usz.ch](mailto:jacopo.bellomo@usz.ch)

21 **Authorship contributions:**

22 Data collection and curation: J.B., M.S., V.S., CHB.V., D.M.

23 Analysis of the data and preparing the manuscript draft: J.B., J.F.

24 Revising the manuscript: all authors

25 Supervising the study: J.F., S.W., A.L.

26 All authors approved the final manuscript version.

27

28 **Total word count of the manuscript: 5272 words**

29

30

31

32

33

34

35 **ABSTRACT**

36 **Background and purpose:** In acute ischemic stroke due to large-vessel occlusion (LVO), the  
37 clinical outcome after endovascular thrombectomy (EVT) is influenced by the extent of  
38 autoregulatory hemodynamic impairment and collateral recruitment, which can be derived  
39 from blood oxygenation-level dependent cerebrovascular reactivity (BOLD-CVR). BOLD-  
40 CVR imaging identifies brain areas influenced by hemodynamic steal. We sought to  
41 investigate the presence of steal phenomenon and its relationship to DWI lesions and clinical  
42 deficit in the acute phase of ischemic stroke following successful vessel recanalization.

43 **Methods:** From the prospective longitudinal IMPreST (Interplay of Microcirculation and  
44 Plasticity after ischemic Stroke) cohort study, patients with acute ischemic unilateral LVO  
45 stroke of the anterior circulation with successful endovascular thrombectomy (EVT; mTICI  
46 scale  $\geq 2b$ ) and subsequent BOLD-CVR examination were included for this analysis. We  
47 analyzed the spatial correlation between brain areas exhibiting BOLD-CVR associated steal  
48 phenomenon and DWI infarct lesion as well as the relationship between steal phenomenon  
49 and NIHSS score at hospital discharge.

50 **Results:** Included patients (n=21) exhibited steal phenomenon to different extents, whereas  
51 there was only a partial spatial overlap with the DWI lesion (median 18.51%; IQR, 8.44-  
52 59.09). The volume of steal phenomenon outside the DWI lesion showed a positive  
53 correlation with overall DWI lesion volume and was a significant predictor for the NIHSS  
54 score at hospital discharge.

55 **Conclusions:** Patients with acute ischemic unilateral LVO stroke exhibited hemodynamic  
56 steal identified by BOLD-CVR after successful EVT. Steal volume was associated with DWI  
57 infarct lesion size and with poor clinical outcome at hospital discharge. BOLD-CVR may  
58 further aid in better understanding persisting hemodynamic impairment following reperfusion  
59 therapy.

60 **Keywords:** ischemic stroke; large-vessel occlusion; cerebrovascular reactivity; steal  
61 phenomenon; BOLD-CVR; DWI; endovascular thrombectomy; reperfusion failure.

62 **Abbreviations:** LVO = large-vessel occlusion; BOLD = blood oxygen-level dependent; MRI  
63 = magnetic resonance imaging; CVR = cerebrovascular reactivity; DWI = diffusion-weighted  
64 imaging; EVT = endovascular thrombectomy; NIHSS = National Institutes of Health Stroke  
65 Scale; mTICI = modified Thrombolysis In Cerebral Infarction; IMPreST = Interplay of  
66 Microcirculation and Plasticity after ischemic Stroke; SD = standard deviation; SE = standard  
67 error.

68

69

70

71

72

73

74

75

76

77

78

79

80

81

82

83

84

85

86

87

88

## 89 INTRODUCTION

90 Acute ischemic large-vessel occlusion (LVO) stroke is characterized by proximal occlusion of  
91 a large cerebral vessel (e.g., internal carotid artery or middle cerebral artery) and has a  
92 profound hemodynamic impact on distal brain tissue, i.e., hypoperfusion and tissue ischemia.<sup>1</sup>  
93 Hypoperfusion and consecutive tissue damage is a dynamic process in the acute ischemic  
94 phase which is influenced by collateral recruitment and autoregulation.<sup>1-4</sup> Timely restoration  
95 of cerebral blood flow by endovascular thrombectomy (EVT) is the most effective maneuver  
96 for salvaging ischemic brain tissue that is not already irreversibly lost.<sup>5-8</sup> However, in some  
97 cases no improvement or even worsening of clinical status despite successful vessel  
98 recanalization can be observed. It is hypothesized that the mechanisms underlying this  
99 reperfusion failure are attributable to remaining macro- and/or microvascular dysfunction and  
100 subsequent persisting hemodynamic impairment within the ischemic territory.<sup>9-11</sup>

101 In recent years, several neuroimaging techniques have been employed investigating  
102 microvasculature and hemodynamic tissue responses following acute ischemia and  
103 subsequent endovascular revascularization to predict tissue fate.<sup>10,12,13</sup> Hyper- and  
104 hypoperfusion tissue status observed with perfusion-weighted magnetic resonance imaging  
105 (MRI) have been both associated with poor clinical outcome. For instance, hypoperfusion  
106 despite successful EVT is thought to result from insufficient capillary reflow induced by  
107 different mechanisms (e.g. microvascular occlusion with microclots or neutrophils)<sup>13-16</sup>.  
108 Hyperperfusion, most likely, comes from persisting altered cerebrovascular  
109 autoregulation<sup>13,17</sup>. A better characterization of hemodynamic tissue state in these patients  
110 would help to further understand the mechanisms underlying reperfusion failure.

111 Blood oxygenation-level dependent cerebrovascular reactivity (BOLD-CVR) may be suited as  
112 an emerging, clinically applicable, hemodynamic imaging technique capable to evaluate  
113 vessel reactivity and remaining vasodilatory reserve as the result of flow redistribution under

114 a controlled hypercapnic challenge.<sup>18-20</sup> Of particular interest are brain areas exhibiting  
115 BOLD-CVR associated steal phenomenon in the post-reperfusion period, indicating persisting  
116 severely impaired cerebrovascular autoregulatory loss and insufficient collateral  
117 compensatory activation.<sup>21,22</sup> Recently, we have enabled a clinical infrastructure for advanced  
118 MRI investigations in patients presenting with acute ischemic unilateral LVO stroke after  
119 reperfusion therapy (IMPreST prospective cohort study, <https://www.stroke.uzh.ch/en.html>).

120 We therefore studied the presence of BOLD-CVR identified steal, i.e., a paradoxical BOLD  
121 signal drop during hypercapnia<sup>19</sup>, and its association with diffusion-weighted imaging (DWI)  
122 lesions, as well as clinical outcome after acute ischemic unilateral LVO stroke following  
123 successful endovascular thrombectomy.

## 124 **MATERIALS AND METHODS**

### 125 Study population

126 From the prospective IMPreST (Interplay of Microcirculation and Plasticity after ischemic  
127 Stroke) longitudinal observational cohort study, we selected all patients with acute ischemic  
128 unilateral LVO stroke of the anterior circulation that were successfully treated with EVT  
129 (modified Thrombolysis In Cerebral Infarction - mTICI - scale  $\geq 2$ <sup>23</sup>) and received BOLD-  
130 CVR examination. The IMPreST study is a prospective study designed to explore the  
131 correlation between different imaging modalities for microcirculation and its association with  
132 clinical outcome in patients with acute ischemic unilateral LVO stroke. Inclusion criteria  
133 were: (1)  $\leq 72$  hours first-ever clinical ischemic stroke at hospital admission; (2) occlusion of  
134 M1/M2-segment of the middle cerebral artery, and/or intracranial internal carotid artery, and  
135 perfusion deficits with cortical involvement; (3) 18 years or above; (4) living independent  
136 before stroke (modified Ranking Scale - mRS -  $\leq 3$ <sup>24</sup>); (5) written informed consent of the  
137 patient or when the patient is not able to participate in the consenting procedure, the written  
138 authorization of an independent doctor who is not involved in the research project to

139 safeguard the interests of the patients (in that case, post-hoc written informed consent of the  
140 patient or next of kin had to be obtained). Exclusion criteria were: (1) major cardiac,  
141 psychiatric and/or neurological diseases; (2) early seizures; (3) known or suspected non-  
142 compliance, drug and/or alcohol abuse; (4) contra-indications for MRI; (5) documented  
143 evidence that the patient does not want to participate in any scientific study. Included patients  
144 received standard multimodality MRI at predefined time points (i.e.,  $\leq 72$  hours, at day  $7\pm 3$ ,  
145 at day  $90\pm 14$ ) from stroke symptom onset. The exact scanning protocol can be reviewed in  
146 the **Supplementary material** section. For this work, we considered only BOLD-CVR and  
147 DWI data acquired during the first examination session (i.e.,  $\leq 72$  hours from stroke symptom  
148 onset).

#### 149 Ethics

150 The research ethic committee of the Canton Zurich, Switzerland (Kantonale Ethikkommission  
151 Zürich; KEK-ZH-NR. 2019-00750) approved the IMPreST prospective observational cohort  
152 study. Written informed consent was obtained from each participant before inclusion. The  
153 study was conducted in accordance with the ethical standards as laid down in the 1964  
154 Declaration of Helsinki and its later amendments.

#### 155 Image acquisition protocol

156 The imaging study was performed at 3-Tesla Skyra MRI scanner (Siemens Healthineers,  
157 Forchheim, Germany) with a 32-channel head matrix coil after the patients have been enrolled  
158 in the study. The imaging protocol included diffusion-weighted imaging (DWI) [2D EPI  
159 sequence, repetition and echo time (TR/TE) = 2500/75 ms, flip angle =  $90^\circ$ , slice thickness  
160 (ST) = 5 mm,  $b$ -values = B0 and B1000 s/mm<sup>2</sup>], BOLD imaging [2D EPI sequence, TR/TE =  
161 2000/30 ms, flip angle =  $85^\circ$ , bandwidth 2368 Hz/Px, and field of view (FOV) 192x192  
162 mm<sup>2</sup>], 3D T1-MPRAGE imaging [TR/TE = 2200/5.14 ms, flip angle  $8^\circ$ , ST 1 mm, FOV  
163 230x230 mm<sup>2</sup>]. During the BOLD MRI sequence, a standardized carbon dioxide (CO<sub>2</sub>)

164 stimulus was applied using the RespirAct™ (Thornhill Research Institute, Toronto, Canada),  
165 that allows for precise CO<sub>2</sub> end-tidal pressure (P<sub>et</sub>CO<sub>2</sub>) targeting while maintaining normal  
166 levels of O<sub>2</sub> (iso-oxia).<sup>25</sup> Our standardized CO<sub>2</sub> protocol consisted of an initial 100 s at the  
167 patient-specific resting P<sub>et</sub>CO<sub>2</sub>, after which P<sub>et</sub>CO<sub>2</sub> was increased of 10 mmHg for 80 s, and a  
168 return to resting P<sub>et</sub>CO<sub>2</sub> for 120 s; P<sub>et</sub>O<sub>2</sub> was maintained at the patient-specific resting value  
169 for the entire duration of the examination.

170 As specified above, BOLD-CVR imaging and DWI data were collected in a single  
171 examination session within 72 hours from stroke symptom onset. The quality of the single  
172 BOLD-CVR imaging data was evaluated considering head motion artifacts and the  
173 consistency of the CO<sub>2</sub> stimulus. Specifically, examination were discarded from our analysis  
174 if the mean frame-wise displacement between adjacent acquisition volumes was > 2 mm<sup>26</sup> or  
175 if the CO<sub>2</sub> step change was < 6 mmHg.

#### 176 Image processing

177 Morphological and functional images were first processed singularly to calculate parameter  
178 maps. BOLD-CVR maps were obtained according to the previously described Zurich analysis  
179 pipeline<sup>27</sup> using MATLAB2019 (The MathWorks, Inc., Natick, United States) and SPM12  
180 (Wellcome Trust Centre for Neuroimaging, Institute of Neurology, University College  
181 London). BOLD-CVR was calculated voxel-per-voxel as percentage of BOLD signal change  
182 divided by the absolute change in P<sub>et</sub>CO<sub>2</sub> (% ΔBOLD/mmHg). Apparent diffusion coefficient  
183 (ADC) maps were automatically calculated from DWI data. All the resulting maps were then  
184 co-registered to the individual anatomical T1 space (intra-individual co-registration) using  
185 SPM12. Lastly, we extrapolated quantitative values from the co-registered parameter maps for  
186 different region of interests (ROIs) - i.e., whole brain (WB), grey matter (GM) and white  
187 matter (WM), ipsilateral and contralateral hemisphere, and major vascular territories (anterior  
188 cerebral artery, ACA; middle cerebral artery, MCA; posterior cerebral artery, PCA). ROIs of

189 the vascular territories were provided by the recently published atlases by Liu et al.<sup>28</sup> To  
190 better investigate brain areas under steal, we selected for each patient the relevant voxels  
191 showing negative response in the BOLD-CVR map. First, we considered all voxels with < 0%  
192 BOLD signal change/mmHg CO<sub>2</sub>. Then, using our healthy atlas as reference, a Z-score map<sup>29</sup>  
193 of the BOLD-CVR map was generated and the voxels with Z-score < 2 were excluded. In this  
194 way, only those negative voxels that differed significantly from the healthy cohort were  
195 considered (**Supplementary Figure 1**). Additionally, for each patient the deep learning-based  
196 algorithm by Liu et al. was used to automatically segment stroke lesion from DWI data (DWI  
197 infarct stroke lesion).<sup>30</sup>

#### 198 Statistical analysis

199 The statistical analysis of this study was carried out with the statistical program *R studio*  
200 (Posit Software, PBC formerly R Studio, version 02.07.2022). First, we described for each  
201 patient the mean BOLD-CVR values as well as the volumetric distribution of BOLD-CVR  
202 associated steal phenomenon in the different vascular territories and within the DWI infarct  
203 stroke lesion. Secondly, we looked at the spatial correlation between BOLD-CVR associated  
204 steal phenomenon and DWI infarct lesion by calculating the percentage of tissue exhibiting  
205 steal phenomenon that was also included in the infarct lesion. We defined therefore DWI-  
206 positive steal phenomenon-positive respectively DWI-negative steal phenomenon-positive  
207 brain tissue areas, and we performed a Spearman's correlation analysis to study the partial  
208 correlation between DWI-negative steal phenomenon-positive brain tissue and DWI infarct  
209 lesion with symptom-to-MR time (in hour, defined as time between stroke symptom onset and  
210 baseline MR study session), age and pre-thrombectomy NIHSS values as confounding  
211 variables (covariates). Lastly, we modeled a multivariable linear regression model to study the  
212 effect of the presence of DWI-negative steal-positive brain tissue on NIHSS values at



213 discharge with DWI lesion volumes, pre-thrombectomy NIHSS values, and age as  
214 confounding variables (covariates).

## 215 RESULTS

216 Between October 2019 and February 2022, twenty-six patients with acute ischemic unilateral  
217 LVO stroke consecutively included in the IMPreST prospective study received BOLD-CVR  
218 examination within 72 hours from stroke symptom onset. Of these, 5 patients were excluded  
219 due to excessive head movement during MR examination. Twenty-one patients were included  
220 in analysis (**Figure 1**) and their baseline characteristics can be reviewed in **Table 1**.

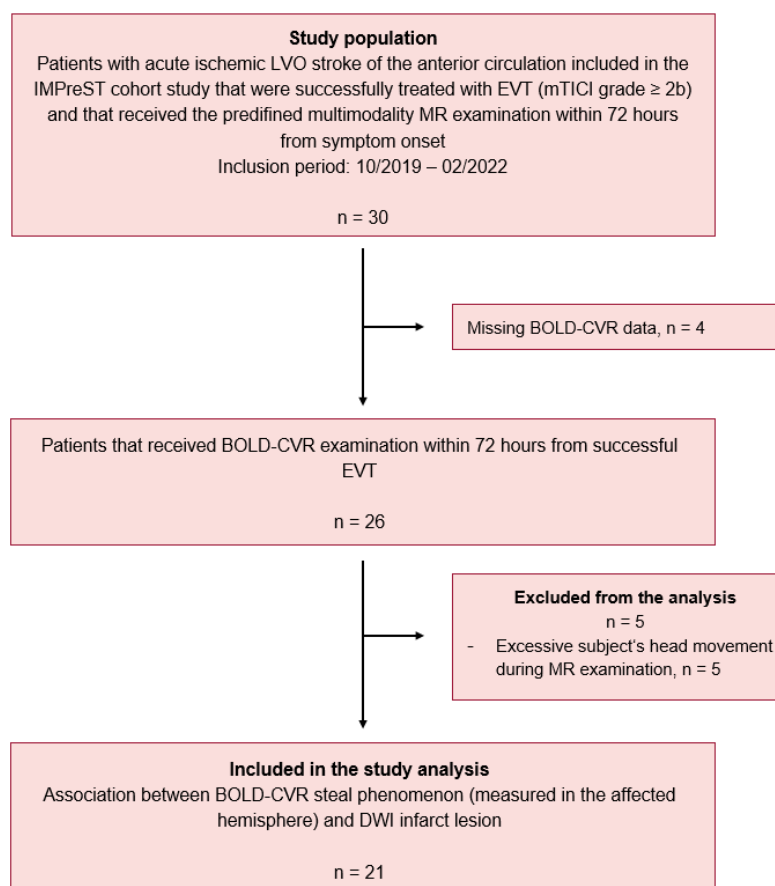

221

222

**Figure 1. Study flow chart.**

223 LVO indicates large-vessel occlusion stroke; IMPreST, Interplay of Microcirculation and  
224 Plasticity after ischemic Stroke; EVT, endovascular thrombectomy; mTICI, modified  
225 Thrombolysis in Cerebral Infarction; MR, magnetic resonance; BOLD-CVR, blood oxygen  
226 level dependent cerebrovascular reactivity; DWI, diffusion-weighted imaging.

227

228 In the MR examination session after successful reperfusion therapy, we found high variability  
229 of the presence of steal phenomenon in the affected MCA and ACA territory of the included  
230 patients, with a median volume of 21.58 mL (IQR, 7.68-64.11). **Table 2** summarizes the  
231 volumetric distribution of BOLD-CVR steal for all the included patients. Interestingly, steal-  
232 affected regions were heterogeneously distributed both within and outside the DWI lesion. On  
233 average, only 18.51% (INR, 8.44-59.09) of DWI lesion overlapped the steal area; respectively  
234 only 26.31% (IQR, 13.84-39.47) of steal volume was part of the DWI lesion (**Supplementary**  
235 **Figure 2**). Within the DWI lesion, on average, severely impaired BOLD-CVR values were  
236 observed (mean  $\pm$  SD;  $0.042 \pm 0.058 \Delta\text{BOLD\%/mmHg}$ ). A Spearman's correlation analysis  
237 showed a positive partial correlation (correlation coefficient 0.64; SE 0.20; *P* value 0.004)  
238 between DWI lesion volume and BOLD-CVR steal volume found outside the stroke lesion  
239 after correcting for possible confounding variables (age, symptom-to-MR time, and NIHSS  
240 baseline values).

241 At hospital discharge the median NIHSS score value was 2.00 (IQR, 1.00-7.25). Five-teen  
242 patients had a NIHSS score equal or less than 3 (median, min-max; 1, 0-3), the remaining six  
243 patients more than 3 (median, min-max; 9.50, 7.00-18.00). A comparison of NIHSS values at  
244 hospital admission (pre-thrombectomy) and at hospital discharge are presented in **Figure 2**.

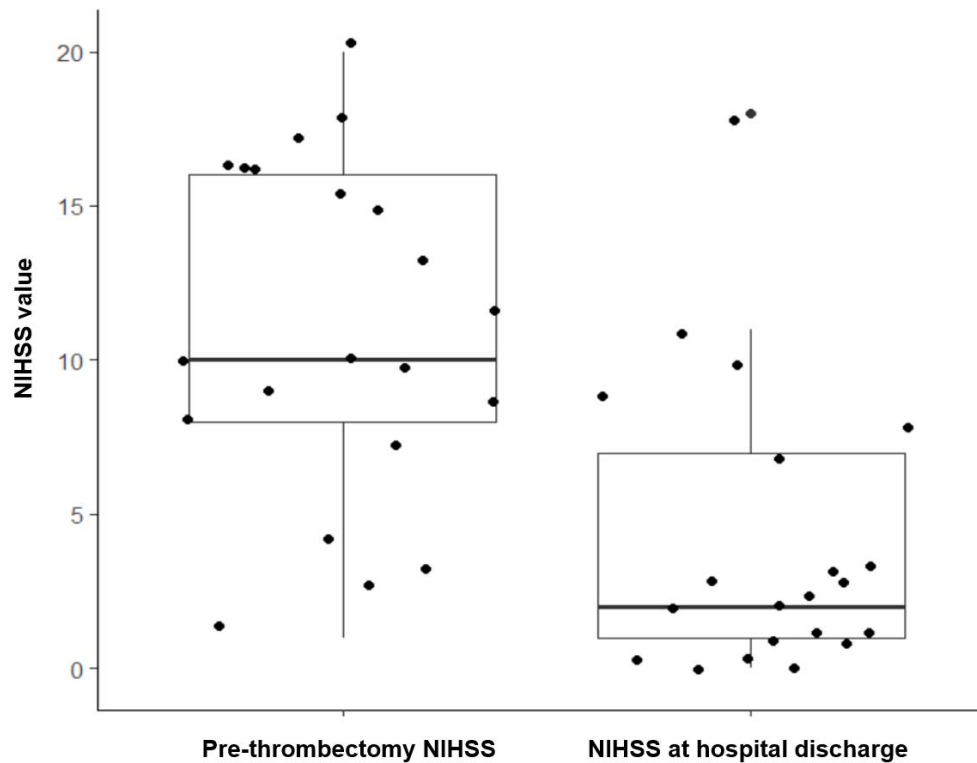

245

246

**Figure 2. Boxplot of NIHSS score measurements over time.**

247

NIHSS indicates National Institutes of Health Stroke Scale.

248

249 A multivariable linear regression model (**Table 3**) showed that the volume of BOLD-CVR

250 defined steal found outside the DWI lesion was a significant predictor for the NIHSS score at

251 discharge (regression coefficient  $\beta$  0.07, SE 0.03, *P* value 0.034) after correcting for DWI

252 lesion size, pre-thrombectomy NIHSS values, and age (adjusted  $R^2$  0.64, *P* value <0.001). In

253 **Figure 3**, BOLD-CVR and DWI findings of four example patients are presented.

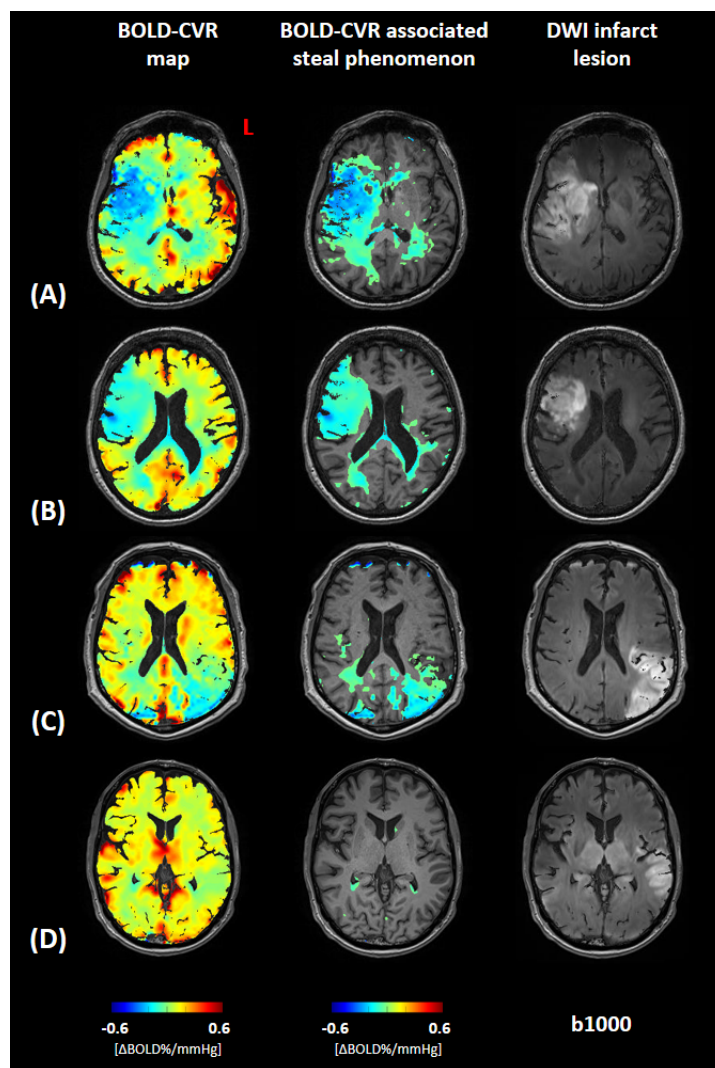

254

255 **Figure 3. Association between BOLD-CVR associated steal phenomenon and DWI**  
256 **infarct lesion.**

257 Blood oxygen level dependent cerebrovascular reactivity (BOLD-CVR) and trace DWI  
258 (diffusion-weighted imaging) map of four illustrative examples are presented. For each  
259 patient a whole-brain BOLD-CVR map, a BOLD-CVR showing only steal phenomenon  
260 tissue areas, and trace DWI map are depicted. **A**, male subject (age range: 66-70 years)  
261 showing 97.12 mL infarct lesion in the middle cerebral artery (MCA) territory right, showing  
262 a total of 189.76 mL steal phenomenon, 73.84 mL within and 115.52 mL outside the infarct  
263 lesion. NIHSS 16 at hospital admission, NIHSS 9 at hospital discharge. **B**, female subject (age  
264 range: 66-70 years) showing 52.84 mL infarct lesion in the MCA territory right, showing a  
265 total of 113.19 mL steal phenomenon, 46.55 mL within and 66.64 mL outside the infarct  
266 lesion. NIHSS 12 at hospital admission, NIHSS 10 at hospital discharge. **C**, male subject (age  
267 range: 71-75 years) showing 89.57 mL infarct lesion in the MCA territory left, showing a total  
268 of 83.99 mL steal phenomenon, 51.79 mL within and 32.20 mL outside the infarct lesion.  
269 NIHSS 10 at hospital admission, NIHSS 1 at hospital discharge. **D**, male subject (age range:  
270 66-70 years) showing 47.15 mL infarct lesion in the MCA territory left, showing a total of  
271 4.40 mL steal phenomenon, 0.70 mL within and 3.70 mL outside the infarct lesion. NIHSS 3  
272 at hospital admission, NIHSS 1 at hospital discharge.

273

## 274 **DISCUSSION**

275 Our study shows that BOLD-CVR associated steal phenomenon can be detected in the  
276 affected hemisphere of patients with acute ischemic unilateral LVO stroke despite successful  
277 EVT, which may indicate reperfusion failure. Brain areas with steal phenomenon only  
278 showed a partial spatial agreement with DWI infarct lesions, whereas steal phenomenon was  
279 also observed in brain tissue outside the DWI lesion. The brain tissue volume exhibiting steal  
280 phenomenon outside the infarct – DWI – lesion correlated strongly with the volume of DWI  
281 derived infarct lesion and was a significant predictor for a poorer clinical status at hospital  
282 discharge.

283 To the best of our knowledge, we could not identify similar studies measuring CVR after  
284 acute reperfusion therapy in a similar cohort of patients, and therefore a direct comparison of  
285 our results with already existing findings is not possible to date. However, some clinical  
286 studies reported the findings observed with other imaging techniques.<sup>31–35</sup> A dynamic growth  
287 of DWI lesion after revascularization procedures has been observed reflecting reperfusion  
288 failure.<sup>31,35</sup> Infarct growth contributes to the final infarct volume, correlates with clinical  
289 outcome and has been associated with DWI lesion size pre-EVT as well as mTICI grade < 2b  
290 and hypoperfusion post-EVT.<sup>31</sup> These findings enhance the importance of identifying  
291 prognostic factors that are associated with reperfusion failure and can therefore predict infarct  
292 lesion evolution after EVT. A recent work of Potreck et al.<sup>33</sup> studied tissue response after  
293 successful EVT with combined perfusion and permeability MR imaging and showed distinct  
294 post-reperfusion pathophysiological tissue responses that were associated with different  
295 clinical courses. In general, hypoperfusion occurred more often in patients with unfavourable  
296 clinical outcome compared to hyperperfusion or unchanged perfusion. BOLD-CVR imaging,  
297 thanks to its capability to study vessel reactivity, offers the potential to provide additional  
298 information about microvascular functionality. We focused our analysis on brain regions

299 exhibiting BOLD-CVR identified steal because we thought this could represent irreversible  
300 tissue damage and/or brain areas subjected to reperfusion failure. Based on the current  
301 knowledge on the pathophysiological mechanisms of reperfusion failure<sup>9,14,16</sup>, we  
302 hypothesized that steal phenomenon could reflect on of the following: (1) exhausted regional  
303 vasodilatory reserve induced by microvascular occlusion with microclots, microvascular  
304 occlusion with recruited neutrophils, and/or vessel constriction; (2) loss of cerebrovascular  
305 autoregulation. Most of the knowledge about reperfusion failure mechanisms came from pre-  
306 clinical studies. Recently, Binder et al.<sup>36</sup> investigated the role of leptomeningeal collaterals in  
307 reperfusion failure in a rodent stroke model and reported a loss of vascular tone (i.e., loss of  
308 autoregulation) in the distal MCA branch segments after reperfusion which was associated  
309 with a worse clinical outcome.

310 In our study, we observed a partial spatial agreement between DWI infarct lesion and BOLD-  
311 CVR identified steal. We can distinguish three different tissue areas: DWI-positive steal-  
312 negative brain tissue, DWI-positive steal-positive brain tissue, and DWI-negative steal-  
313 positive brain tissue. In the DWI infarct lesion (“DWI-positive”), both steal phenomenon and  
314 impaired, but maintained BOLD-CVR values were observed. Two possible explanations to  
315 this finding seem plausible: (1) infarcted necrotic tissue included in the DWI lesion represents  
316 tissue with disrupted vessels (i.e., no cerebrovascular reactivity) and therefore shows BOLD-  
317 CVR around zero with either slightly positive or slightly negative values<sup>37</sup>; (2) a part of the  
318 DWI lesion represents cerebral tissue not yet irreversible damaged that shows maintained  
319 cerebrovascular reactivity after successful reperfusion<sup>35,38</sup>. Of major clinical relevance we  
320 observed tissue exhibiting a steal phenomenon that was not included in the DWI lesion  
321 (“DWI-negative”), which could indicate tissue not irreversibly damaged but with severely  
322 impaired hemodynamic characteristics. We found a positive correlation of this DWI-negative  
323 steal-positive brain tissue with DWI infarct lesion size and a significant association with  
324 higher NIHSS clinical score at hospital discharge. These findings indirectly support what we

325 assumed in the beginning, namely, that the steal phenomenon does not reflect just infarcted  
326 tissue and that the identified DWI-negative steal-positive region could depict brain tissue with  
327 microvascular dysfunction (i.e., reperfusion failure) that could evolve to an irreversibly  
328 infarcted area.

### 329 Future directions

330 Our preliminary findings highlight the potential of BOLD-CVR imaging as a novel technique  
331 to characterize brain tissue hemodynamic responses after EVT. Future research, however, is  
332 needed to further understand the link between the observed BOLD-CVR steal phenomenon  
333 and reperfusion failure and its association with clinical outcome. A correlation analysis  
334 between BOLD-CVR findings and MR perfusion parameters (i.e., cerebral blood flow, CBF,  
335 cerebral blood volume, CBV, mean transit time, MTT, time-to-maximum,  $T_{max}$ ) could be  
336 performed to confirm our hypothesis of the mechanisms behind steal phenomenon observed  
337 in reperfused tissue (i.e., both loss of autoregulation with associated hyperperfusion and  
338 microvascular occlusion/constriction with associated hypoperfusion). In addition, a  
339 retrospective analysis to identify which pre-thrombectomy clinical/imaging factors are  
340 associated with the occurrence of steal phenomenon could be considered.

### 341 Strength and limitations

342 This work represents a preliminary analysis of BOLD-CVR findings in a well-defined cohort  
343 of patients with acute ischemic unilateral LVO stroke. The investigated imaging modalities  
344 (BOLD-CVR and DWI) were acquired within the same examination session and therefore  
345 high intra-subject comparability between imaging data can be assumed. However, this study  
346 has some limitations. First, the small sample size of the studied cohort limited the  
347 generalizability of our analysis and therefore further studies including more patients are  
348 necessary to confirm our observations. Second, to avoid unethical diagnostic delay, our study  
349 did not provide imaging data about tissue state before reperfusion therapy. Therefore, the

350 clinical meaning of BOLD-CVR identified steal before EVT is unknown. Third, we created a  
351 steal phenomenon mask from the BOLD-CVR magnitude maps selecting all the voxel  
352 exhibiting a negative response to the hypercapnic stimulus. However, the clinical relevance of  
353 this steal phenomenon mask has not yet been investigated and other definitions based on  
354 different thresholds respectively considering also more technical imaging aspects (e.g.,  
355 contrast-to-noise ratio) should be also evaluated in the future.

## 356 **CONCLUSIONS**

357 Patients with unilateral acute ischemic large-vessel occlusion stroke exhibit BOLD-CVR  
358 associated steal in the early phase despite successful EVT. Steal volume was associated with  
359 DWI lesion size, and with poor clinical outcome at hospital discharge. The BOLD-CVR  
360 identified steal phenomenon may provide a better understanding of persisting hemodynamic  
361 impairment following reperfusion therapy.

362

363

364

365

366

367

368

369

370

371



372

373

374 **ACKNOWLEDGMENTS, SOURCES OF FUNDING, DISCLOSURES**

375 **Sources of Funding:** This project was funded by the Clinical Research Priority Program of  
376 the University of Zurich (UZH CRPP Stroke), the Swiss National Science Foundation  
377 (PP00P3\_170683), the Swiss Cancer Research Foundation (KFS-3975-082016-R), and the  
378 Theodor und Ida Herzog-Egli-Stiftung.

379 **Disclosures:** none.

380

381

382

383

384

385

386

387

388

389

390

391

392

393

394

395

396

397

398

399

400 **Supplemental Material**

401 Figures S1-S2

402 Supplemental methods

403

## 404 REFERENCES

- 405 1. Muir KW, Buchan A, von Kummer R, Rother J, Baron JC. Imaging of acute stroke.  
406 *Lancet Neurol.* 2006;5(9):755-768. doi:10.1016/S1474-4422(06)70545-2
- 407 2. Seifert K, Heit JJ. Collateral Blood Flow and Ischemic Core Growth. *Transl Stroke Res.*  
408 2023;14(1):13-21. doi:10.1007/s12975-022-01051-2
- 409 3. Seners P, Yuen N, Mlynash M, et al. Quantification of Penumbra Volume in  
410 Association With Time From Stroke Onset in Acute Ischemic Stroke With Large Vessel  
411 Occlusion. *JAMA Neurol.* Published online March 20, 2023:e230265.  
412 doi:10.1001/jamaneurol.2023.0265
- 413 4. Sebök M, Esposito G, Niftrik CHB van, et al. Flow augmentation STA-MCA bypass  
414 evaluation for patients with acute stroke and unilateral large vessel occlusion: a proposal  
415 for an urgent bypass flowchart. *J Neurosurg.* Published online January 7, 2022:1-9.  
416 doi:10.3171/2021.10.JNS21986
- 417 5. Powers WJ, Rabinstein AA, Ackerson T, et al. Guidelines for the Early Management of  
418 Patients With Acute Ischemic Stroke: 2019 Update to the 2018 Guidelines for the Early  
419 Management of Acute Ischemic Stroke: A Guideline for Healthcare Professionals From  
420 the American Heart Association/American Stroke Association. *Stroke.*  
421 2019;50(12):e344-e418. doi:10.1161/STR.0000000000000211
- 422 6. Hankey GJ. Stroke. *Lancet Lond Engl.* 2017;389(10069):641-654. doi:10.1016/S0140-  
423 6736(16)30962-X
- 424 7. Malik P, Anwar A, Patel R, Patel U. Expansion of the dimensions in the current  
425 management of acute ischemic stroke. *J Neurol.* 2021;268(9):3185-3202.  
426 doi:10.1007/s00415-020-09873-6
- 427 8. Olthuis SGH, Pirson FAV, Pinckaers FME, et al. Endovascular treatment versus no  
428 endovascular treatment after 6-24 h in patients with ischaemic stroke and collateral flow  
429 on CT angiography (MR CLEAN-LATE) in the Netherlands: a multicentre, open-label,  
430 blinded-endpoint, randomised, controlled, phase 3 trial. *Lancet Lond Engl.* Published  
431 online March 29, 2023:S0140-6736(23)00575-5. doi:10.1016/S0140-6736(23)00575-5
- 432 9. El Amki M, Wegener S. Improving Cerebral Blood Flow after Arterial Recanalization:  
433 A Novel Therapeutic Strategy in Stroke. *Int J Mol Sci.* 2017;18(12):2669.  
434 doi:10.3390/ijms18122669
- 435 10. Nie X, Leng X, Miao Z, Fisher M, Liu L. Clinically Ineffective Reperfusion After  
436 Endovascular Therapy in Acute Ischemic Stroke. *Stroke.* 2023;54(3):873-881.  
437 doi:10.1161/STROKEAHA.122.038466
- 438 11. Lee JS, Bang OY. Collateral Status and Outcomes after Thrombectomy. *Transl Stroke*  
439 *Res.* 2023;14(1):22-37. doi:10.1007/s12975-022-01046-z

- 440 12. Zhang Z, Pu Y, Mi D, Liu L. Cerebral Hemodynamic Evaluation After Cerebral  
441 Recanalization Therapy for Acute Ischemic Stroke. *Front Neurol.* 2019;10:719.  
442 doi:10.3389/fneur.2019.00719
- 443 13. N van der K, Baa F, Cblm M, A van der L, Rm D. Implications of Post-recanalization  
444 Perfusion Deficit After Acute Ischemic Stroke: a Scoping Review of Clinical and  
445 Preclinical Imaging Studies. *Transl Stroke Res.* Published online January 19, 2023.  
446 doi:10.1007/s12975-022-01120-6
- 447 14. Okada Y, Copeland BR, Fitridge R, Koziol JA, del Zoppo GJ. Fibrin contributes to  
448 microvascular obstructions and parenchymal changes during early focal cerebral  
449 ischemia and reperfusion. *Stroke.* 1994;25(9):1847-1853; discussion 1853-1854.  
450 doi:10.1161/01.str.25.9.1847
- 451 15. El Amki M, Glück C, Binder N, et al. Neutrophils Obstructing Brain Capillaries Are a  
452 Major Cause of No-Reflow in Ischemic Stroke. *Cell Rep.* 2020;33(2):108260.  
453 doi:10.1016/j.celrep.2020.108260
- 454 16. Rayasam A, Hsu M, Kijak JA, et al. Immune responses in stroke: how the immune  
455 system contributes to damage and healing after stroke and how this knowledge could be  
456 translated to better cures? *Immunology.* 2018;154(3):363-376. doi:10.1111/imm.12918
- 457 17. Lin YH, Liu HM. Update on cerebral hyperperfusion syndrome. *J Neurointerventional*  
458 *Surg.* 2020;12(8):788-793. doi:10.1136/neurintsurg-2019-015621
- 459 18. Fisher JA, Venkatraghavan L, Mikulis DJ. Magnetic Resonance Imaging-Based  
460 Cerebrovascular Reactivity and Hemodynamic Reserve. *Stroke.* 2018;49(8):2011-2018.  
461 doi:10.1161/STROKEAHA.118.021012
- 462 19. Sobczyk O, Battisti-Charbonney A, Fierstra J, et al. A conceptual model for CO2-  
463 induced redistribution of cerebral blood flow with experimental confirmation using  
464 BOLD MRI. *NeuroImage.* 2014;92:56-68. doi:10.1016/j.neuroimage.2014.01.051
- 465 20. Fierstra J, Sobczyk O, Battisti-Charbonney A, et al. Measuring cerebrovascular  
466 reactivity: what stimulus to use? *J Physiol.* 2013;591(23):5809-5821.  
467 doi:10.1113/jphysiol.2013.259150
- 468 21. van Niftrik CHB, Sebök M, Wegener S, et al. Increased Ipsilateral Posterior Cerebral  
469 Artery P2-Segment Flow Velocity Predicts Hemodynamic Impairment. *Stroke.*  
470 2021;52(4):1469-1472. doi:10.1161/STROKEAHA.120.032848
- 471 22. Sebök M, Niftrik CHB van, Lohaus N, et al. Leptomeningeal collateral activation  
472 indicates severely impaired cerebrovascular reserve capacity in patients with  
473 symptomatic unilateral carotid artery occlusion. *J Cereb Blood Flow Metab Off J Int Soc*  
474 *Cereb Blood Flow Metab.* 2021;41(11):3039-3051. doi:10.1177/0271678X211024373
- 475 23. Zaidat OO, Yoo AJ, Khatri P, et al. Recommendations on angiographic revascularization  
476 grading standards for acute ischemic stroke: a consensus statement. *Stroke.*  
477 2013;44(9):2650-2663. doi:10.1161/STROKEAHA.113.001972
- 478 24. Rankin J. Cerebral vascular accidents in patients over the age of 60. II. Prognosis. *Scott*  
479 *Med J.* 1957;2(5):200-215. doi:10.1177/003693305700200504

- 480 25. Slessarev M, Han J, Mardimae A, et al. Prospective targeting and control of end-tidal  
481 CO<sub>2</sub> and O<sub>2</sub> concentrations. *J Physiol.* 2007;581(3):1207-1219.  
482 doi:<https://doi.org/10.1113/jphysiol.2007.129395>
- 483 26. Power JD, Mitra A, Laumann TO, Snyder AZ, Schlaggar BL, Petersen SE. Methods to  
484 detect, characterize, and remove motion artifact in resting state fMRI. *NeuroImage.*  
485 2014;84:320-341. doi:10.1016/j.neuroimage.2013.08.048
- 486 27. Niftrik CHB van, Piccirelli M, Bozinov O, et al. Iterative analysis of cerebrovascular  
487 reactivity dynamic response by temporal decomposition. *Brain Behav.*  
488 2017;7(9):e00705. doi:<https://doi.org/10.1002/brb3.705>
- 489 28. Liu CF, Hsu J, Xu X, et al. Digital 3D Brain MRI Arterial Territories Atlas. *Sci Data.*  
490 2023;10(1):74. doi:10.1038/s41597-022-01923-0
- 491 29. Sobczyk O, Battisti-Charbonney A, Poublanc J, et al. Assessing cerebrovascular  
492 reactivity abnormality by comparison to a reference atlas. *J Cereb Blood Flow Metab*  
493 *Off J Int Soc Cereb Blood Flow Metab.* 2015;35(2):213-220.  
494 doi:10.1038/jcbfm.2014.184
- 495 30. Liu CF, Hsu J, Xu X, et al. Deep learning-based detection and segmentation of diffusion  
496 abnormalities in acute ischemic stroke. *Commun Med.* 2021;1:61. doi:10.1038/s43856-  
497 021-00062-8
- 498 31. Hernández-Pérez M, Werner M, Remollo S, et al. Early and Delayed Infarct Growth in  
499 Patients Undergoing Mechanical Thrombectomy: A Prospective, Serial MRI Study.  
500 *Stroke.* Published online November 3, 2022. doi:10.1161/STROKEAHA.122.039090
- 501 32. Kosior JC, Buck B, Wannamaker R, et al. Exploring Reperfusion Following  
502 Endovascular Thrombectomy. *Stroke.* 2019;50(9):2389-2395.  
503 doi:10.1161/STROKEAHA.119.025537
- 504 33. Potreck A, Mutke MA, Weyland CS, et al. Combined Perfusion and Permeability  
505 Imaging Reveals Different Pathophysiologic Tissue Responses After Successful  
506 Thrombectomy. *Transl Stroke Res.* 2021;12(5):799-807. doi:10.1007/s12975-020-  
507 00885-y
- 508 34. Gwak DS, Choi W, Shim DH, et al. Role of Apparent Diffusion Coefficient Gradient  
509 Within Diffusion Lesions in Outcomes of Large Stroke After Thrombectomy. *Stroke.*  
510 2022;53(3):921-929. doi:10.1161/STROKEAHA.121.035615
- 511 35. Nagaraja N, Forder JR, Warach S, Merino JG. Reversible diffusion-weighted imaging  
512 lesions in acute ischemic stroke: A systematic review. *Neurology.* 2020;94(13):571-587.  
513 doi:10.1212/WNL.00000000000009173
- 514 36. Binder NF, Amki ME, Glück C, et al. *Leptomeningeal Collaterals Regulate Reperfusion*  
515 *in Ischemic Stroke.*; 2023:2023.02.25.529915. doi:10.1101/2023.02.25.529915
- 516 37. Garcia JH. The neuropathology of stroke. *Hum Pathol.* 1975;6(5):583-598.  
517 doi:10.1016/s0046-8177(75)80043-8

518 38. Goyal M, Ospel JM, Menon B, et al. Challenging the Ischemic Core Concept in Acute  
 519 Ischemic Stroke Imaging. *Stroke*. 2020;51(10):3147-3155.  
 520 doi:10.1161/STROKEAHA.120.030620

521

522

523 **TABLES**

| Baseline demographics                       | All (n = 21)        |
|---------------------------------------------|---------------------|
| <b>Age</b>                                  |                     |
| Mean ± SD                                   | 69 ± 15             |
| <b>Year group</b>                           |                     |
| <50                                         | 3 (14%)             |
| 50-70                                       | 8 (38%)             |
| >70                                         | 10 (48%)            |
| <b>Sex</b>                                  |                     |
| M                                           | 9 (43%)             |
| F                                           | 12 (57%)            |
| <b>Diseased vessel</b>                      |                     |
| ICA                                         | 2 (10%)             |
| MCA (M1/M2 segment)                         | 11 (52%)            |
| Both                                        | 8 (38%)             |
| <b>Clinical score at hospital admission</b> |                     |
| <b>NIHSS</b>                                |                     |
| Median [IQR]                                | 10.00 [8.00-16.00]  |
| <b>mRS</b>                                  |                     |
| Median [IQR]                                | 4.00 [3.00-5.00]    |
| <b>Comorbidities</b>                        |                     |
| Atrial fibrillation                         | 4 (20%)             |
| Smoking history                             | 5 (24%)             |
| Hypertension                                | 13 (55%)            |
| Dyslipidemia                                | 8 (40%)             |
| Obesity                                     | 3 (15%)             |
| Diabetes                                    | 1 (5%)              |
| <b>Acute reperfusion therapy</b>            |                     |
| IVT                                         | 10 (50%)            |
| EVT                                         | 21 (100%)           |
| <b>Symptom-to-needle time</b>               |                     |
| <4.5 hours                                  | 12 (57%)            |
| >4.5 hours                                  | 2 (10%)             |
| Wake-up stroke                              | 7 (33%)             |
| <b>mTICI grade</b>                          |                     |
| 2b                                          | 5 (24%)             |
| 2c                                          | 3 (14%)             |
| 3                                           | 13 (62%)            |
| <b>Symptom-to-MR time</b>                   |                     |
| <24 hours                                   | 3 (30%)             |
| 24-48 hours                                 | 11 (40%)            |
| 48-72 hours                                 | 7 (30%)             |
| <b>DWI infarct lesion [mL]</b>              |                     |
| Median [IQR]                                | 26.30 [14.58-52.84] |

524

525

**Table 1. Baseline characteristics.**

526 ICA indicates internal carotid artery; MCA, middle carotid artery; NIHSS, National Institutes of  
 527 Health Stroke Scale; mRS, modified Ranking Scale; mTICI, modified Thrombolysis in Cerebral  
 528 Infarction; IVT, intravenous thrombolysis; EVT, endovascular thrombectomy; MR, magnetic  
 529 resonance; DWI, diffusion-weighted imaging.

530

531

532

533

| Subject | Mean BOLD-CVR in MCA territory | Mean BOLD-CVR in ACA territory | Mean $\pm$ SD BOLD-CVR in DWI lesion | DWI infarct lesion volume | SP volume in ACA + MCA territory | SP volume in DWI lesion | SP volume outside DWI lesion |
|---------|--------------------------------|--------------------------------|--------------------------------------|---------------------------|----------------------------------|-------------------------|------------------------------|
| 1       | 0.07                           | 0.11                           | 0.04 $\pm$ 0.01                      | 10.18                     | 14.94                            | 3.84                    | 11.09                        |
| 2       | 0.09                           | 0.07                           | 0.02 $\pm$ 0.01                      | 14.58                     | 42.64                            | 6.42                    | 36.22                        |
| 3       | 0.08                           | 0.14                           | 0.06 $\pm$ 0.01                      | 47.15                     | 4.40                             | 0.70                    | 3.70                         |
| 4       | 0.11                           | 0.09                           | 0.08 $\pm$ 0.01                      | 2.02                      | 2.71                             | 0.06                    | 2.65                         |
| 5       | 0.06                           | 0.08                           | 0.01 $\pm$ 0.01                      | 97.12                     | 189.76                           | 73.84                   | 115.92                       |
| 6       | -0.03                          | -0.01                          | -0.03 $\pm$ 0.02                     | 117.29                    | 174.03                           | 73.75                   | 100.28                       |
| 7       | 0.08                           | 0.06                           | -0.03 $\pm$ 0.02                     | 72.13                     | 129.37                           | 45.88                   | 83.49                        |
| 8       | 0.08                           | 0.06                           | 0.06 $\pm$ 0.01                      | 26.30                     | 8.77                             | 1.24                    | 7.54                         |
| 9       | 0.12                           | 0.08                           | 0.04 $\pm$ 0.01                      | 13.89                     | 4.07                             | 1.34                    | 2.73                         |
| 10      | 0.14                           | 0.12                           | 0.08 $\pm$ 0.01                      | 4.29                      | 2.59                             | 0.00                    | 2.60                         |
| 11      | 0.19                           | 0.23                           | 0.09 $\pm$ 0.02                      | 18.00                     | 21.58                            | 2.79                    | 18.78                        |
| 12      | 0.15                           | 0.20                           | 0.03 $\pm$ 0.03                      | 36.41                     | 42.69                            | 19.34                   | 23.35                        |
| 13      | 0.08                           | 0.08                           | -0.01 $\pm$ 0.01                     | 89.57                     | 83.99                            | 51.79                   | 32.20                        |
| 14      | 0.06                           | 0.00                           | 0.03 $\pm$ 0.01                      | 17.74                     | 25.79                            | 3.28                    | 22.51                        |
| 15      | 0.20                           | 0.14                           | 0.17 $\pm$ 0.02                      | 1.33                      | 0.36                             | 0.00                    | 0.36                         |
| 16      | 0.06                           | 0.15                           | -0.05 $\pm$ 0.01                     | 52.84                     | 113.19                           | 46.55                   | 66.64                        |
| 17      | 0.04                           | 0.05                           | -0.04 $\pm$ 0.02                     | 23.30                     | 57.50                            | 17.92                   | 39.57                        |
| 18      | 0.13                           | 0.10                           | 0.08 $\pm$ 0.01                      | 30.78                     | 18.49                            | 4.97                    | 13.52                        |
| 19      | 0.18                           | 0.13                           | 0.13 $\pm$ 0.02                      | 16.18                     | 9.51                             | 2.11                    | 7.40                         |
| 20      | 0.11                           | 0.10                           | 0.05 $\pm$ 0.01                      | 80.20                     | 33.94                            | 21.05                   | 12.89                        |
| 21      | 0.14                           | 0.12                           | 0.08 $\pm$ 0.01                      | 30.30                     | 4.08                             | 0.59                    | 3.49                         |

534

535 **Table 2. Distribution of BOLD-CVR associated steal phenomenon in the affected hemisphere.**

536 BOLD-CVR values are reported with unit [%  $\Delta$ BOLD/mmHg]; volumes are reported with unit [mL];

537 BOLD-CVR indicates blood oxygen level dependent cerebrovascular reactivity; SP, steal  
538 phenomenon; GM, grey matter; WM, white matter; ACA, anterior cerebral artery; MCA, middle  
539 cerebral artery; PCA, posterior cerebral artery.

540

| Variable                                               | $\beta$ | 95% confidence interval (95-CI) | P value       |
|--------------------------------------------------------|---------|---------------------------------|---------------|
| Intercept                                              | 2.34    | -5.57 to 10.25                  | 0.540         |
| Age                                                    | -0.06   | -0.17 to 0.04                   | 0.223         |
| BOLD-CVR associated SP outside the infarct lesion (mL) | 0.07    | 0.01 to 0.14                    | <b>0.034*</b> |
| DWI infarct lesion volume (mL)                         | 0.03    | -0.03 to 0.10                   | 0.260         |
| NIHSS at hospital admission                            | 0.23    | -0.06 to 0.53                   | 0.116         |

541

542 **Table 3. Results of the linear regression model of the association between BOLD-CVR associated**  
543 **steal phenomenon volume outside the infarct lesion and NIHSS score value at hospital discharge.**

544  $\beta$  indicates the regression coefficient; BOLD-CVR, blood oxygen level dependent cerebrovascular  
545 reactivity; SP, steal phenomenon; DWI, diffusion-weighted imaging; NIHSS, National Institutes of  
546 Health Stroke Scale.

### Study population

Patients with acute ischemic IVO stroke of the anterior circulation included in the MPACT cohort study that were successfully treated with rT (nT) (n = 76) and that received the pre-defined modified mRS examination within 72 hours from symptom onset.

Inclusion period: 03/2010 – 02/2022

n = 30

Missing HCl T2\*WI data, n = 4

Patients that received mRS-CWR examination within 72 hours from successful rT

n = 76

Excluded from the analysis  
(n = 5)

- Excessive subject's head movement during mRS examination, n = 5

Included in the study analysis

Association between HCl T2\*WI signal phenomenon (measured in the affected hemisphere) and DWI infarct lesion

n = 21



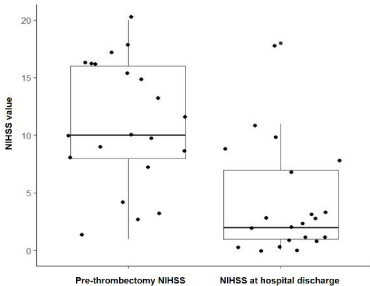

BOLD-CVR  
map

BOLD-CVR associated  
steal phenomenon

DWI infarct  
lesion

(A)

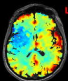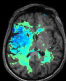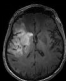

(B)

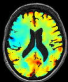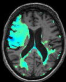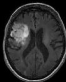

(C)

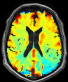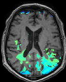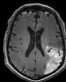

(D)

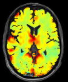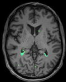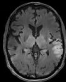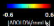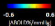

b1000

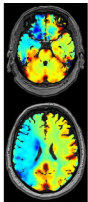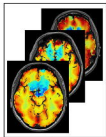

$$\text{CVR} < 0 \rightarrow \text{Z-score} = \frac{\text{CVR}_i - \text{Mean}_{\text{ATLAS}}}{\sigma_{\text{ATLAS}}}$$

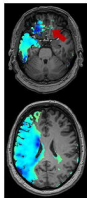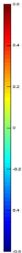

(A)

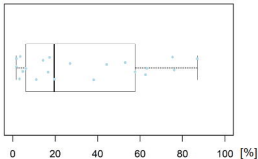

(B)

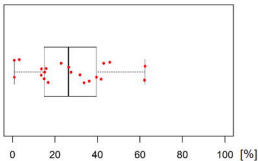

Source: https://medrxiv.org/content/10.1101/2023.05.12.23289821.full.pdf
