# Supplementary material for: BOLD cerebrovascular reactivity MRI to identify tissue reperfusion failure after EVT in patients with LVO acute stroke
Source: bioRxiv or medRxiv preprint supplement (doi:10.1101/2023.05.12.23289821), 2023-05-15
Supplement: Supplementary file [file media-1.pdf]

1 SUPPLEMENTAL MATERIAL

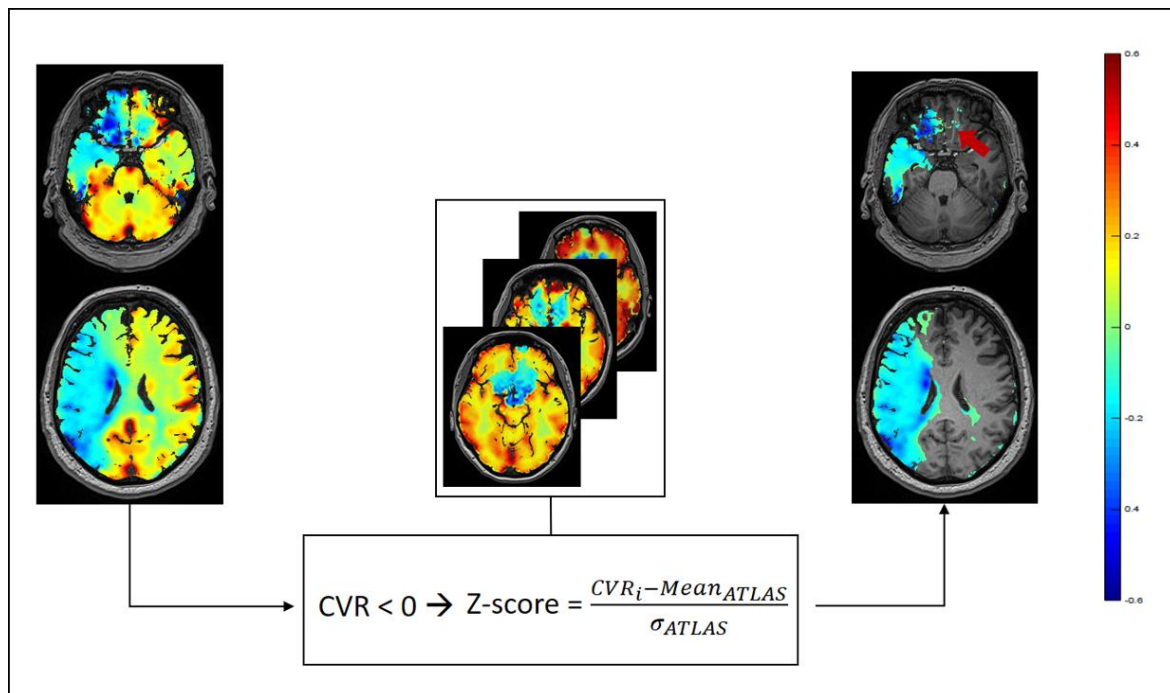

2

3 **Supplementary Figure 1. BOLD-CVR associated steal phenomenon mask generation.**

4 For each patient the relevant voxels showing negative response in the blood oxygen level  
5 dependent cerebrovascular reactivity (BOLD-CVR) map were selected. First, we considered  
6 all voxels with  $< 0\%$  BOLD signal change/mmHg  $CO_2$ . Then, using our healthy atlas as  
7 reference, a Z-score map of the CVR map was generated and the voxels with Z-score  $< 2$   
8 were excluded. In this way, only those negative voxels that differed significantly from the  
9 healthy cohort (e.g., voxels with artefact-related negative BOLD signal in the frontobasal  
10 brain region, red arrow) were considered.

11

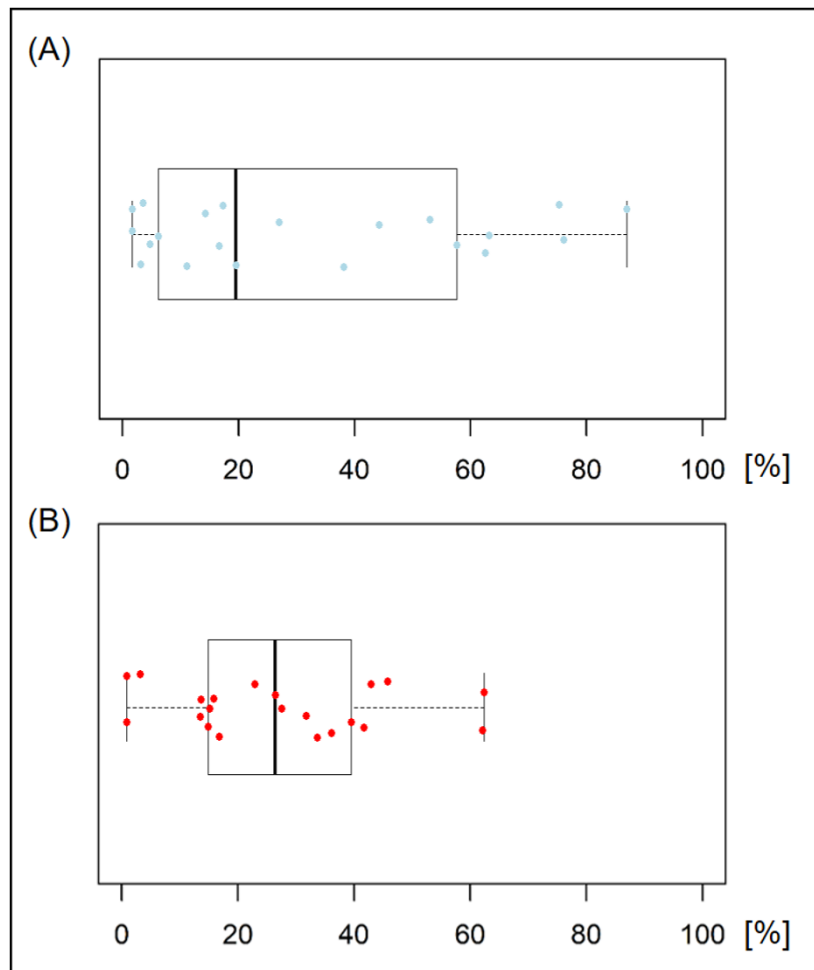

12

13 **Supplementary Figure 2. Spatial correlation between BOLD-CVR associated steal**  
 14 **phenomenon and DWI infarct lesion.**

15 BOLD-CVR indicates blood oxygen level dependent cerebrovascular reactivity. **A**, a boxplot  
 16 of the percentage of DWI infarct lesion included in the BOLD-CVR associated steal  
 17 phenomenon; **B**, a boxplot of the percentage of BOLD-CVR associated steal phenomenon  
 18 included in the DWI infarct lesion.

19

\\NRA\Schädel\_32ch\Ischämie\CRPPstroke20191228\_32ch\_New\_Patients6-\CO2\_bold \*

TA: 6:46 min Coil Selection: Auto Voxel Size: 3.0×3.0×3.0 mm<sup>3</sup> Acc.: 2 Rel. SNR: 1.00**Properties**

|                                               |                    |
|-----------------------------------------------|--------------------|
| Start measurement without further preparation | On                 |
| Wait for User to Start                        | Off                |
| Start measurements                            | Single Measurement |
| Prio Recon                                    | Off                |
| Auto Open Inline Display                      | Off                |
| Auto Close Inline Display                     | Off                |
| Load Images to MR View&GO                     | On                 |
| Auto Store Images                             | On                 |
| Load Images to Stamp Segments                 | Off                |
| Load Images to Graphic Segments               | Off                |
| Graphic segment                               | Default            |
| Inline Movie                                  | Off                |

**Routine**

|                     |                    |
|---------------------|--------------------|
| Slice Group         | 1                  |
| Slices              | 35                 |
| Distance Factor     | 10 %               |
| Position            | R0.8 P5.9 H10.6 mm |
| Orientation         | T > C-16.5 > S0.6  |
| Phase Encoding Dir. | A >> P             |
| Phase Oversampling  | 0 %                |
| FoV Read            | 192 mm             |
| FoV Phase           | 100.0 %            |
| Slice Thickness     | 3.0 mm             |
| TR                  | 2000.0 ms          |
| TE                  | 30.00 ms           |
| Averages            | 1                  |
| Concatenations      | 1                  |
| AutoAlign           | Head > Brain       |
| Coil Elements       | HEA;HEP            |

**Contrast - Common**

|                    |                |
|--------------------|----------------|
| TR                 | 2000.0 ms      |
| TE                 | 30.00 ms       |
| MTC                | Off            |
| Flip Angle         | 85 deg         |
| Fat-Water Contrast | Fat Saturation |
| Reconstruction     | Magnitude      |

**Contrast - Dynamic**

|              |          |
|--------------|----------|
| Dynamic Mode | Standard |
| Measurements | 200      |
| Delay in TR  | 0.00 ms  |

**Resolution - Common**

|                  |         |
|------------------|---------|
| FoV Read         | 192 mm  |
| FoV Phase        | 100.0 % |
| Slice Thickness  | 3.0 mm  |
| Base Resolution  | 64      |
| Phase Resolution | 100 %   |
| Interpolation    | Off     |

**Resolution - Acceleration**

|                        |              |
|------------------------|--------------|
| Acceleration mode      | GRAPPA       |
| Reference Scans        | EPI/Separate |
| Acceleration Factor PE | 2            |
| Reference Lines PE     | 32           |
| Phase Partial Fourier  | Off          |

**Resolution - Filter**

|                       |         |
|-----------------------|---------|
| Raw Filter            | Off     |
| Elliptical Filter     | On      |
| Hamming               | Off     |
| Distortion Correction | Off     |
| Normalize             | Prescan |

**Geometry - Common**

|                     |                    |
|---------------------|--------------------|
| Slice Group         | 1                  |
| Slices              | 35                 |
| Distance Factor     | 10 %               |
| Position            | R0.8 P5.9 H10.6 mm |
| Orientation         | T > C-16.5 > S0.6  |
| Phase Encoding Dir. | A >> P             |
| Phase Oversampling  | 0 %                |
| FoV Read            | 192 mm             |
| FoV Phase           | 100.0 %            |
| Slice Thickness     | 3.0 mm             |
| TR                  | 2000.0 ms          |
| Multi-Slice Mode    | Interleaved        |
| Series              | Interleaved        |
| Concatenations      | 1                  |

**Geometry - AutoAlign**

|                     |                    |
|---------------------|--------------------|
| Slice Group         | 1                  |
| Position            | R0.8 P5.9 H10.6 mm |
| Orientation         | T > C-16.5 > S0.6  |
| Phase Encoding Dir. | A >> P             |
| AutoAlign           | Head > Brain       |
| Initial Position    | R0.8 P5.9 H10.6    |
| R                   | 0.8 mm             |
| P                   | 5.9 mm             |
| H                   | 10.6 mm            |
| Initial Orientation | T > C              |
| T > C               | -16.50             |
| > S                 | 0.60               |
| Initial Rotation    | -1.12 deg          |

**Geometry - Saturation**

|                    |      |
|--------------------|------|
| Special Saturation | None |
|--------------------|------|

**Geometry - Tim Planning Suite**

|                   |      |
|-------------------|------|
| Set-n-Go Protocol | Off  |
| Table Position    | 0 mm |
| Table Position    | H    |
| Inline Composing  | Off  |

**System - Miscellaneous**

|                     |                  |
|---------------------|------------------|
| Coil Selection      | Auto Coil Select |
| MSMA                | S - C - T        |
| Sagittal            | R >> L           |
| Coronal             | A >> P           |
| Transversal         | F >> H           |
| Coil Combination    | Adaptive Combine |
| Matrix Optimization | Off              |

**System - Adjustments**

|                      |          |
|----------------------|----------|
| Adjustment Strategy  | Standard |
| B0 Shim              | Standard |
| B1 Shim              | TrueForm |
| Adjustment Tolerance | Auto     |

**System - Adjustments**

|                       |       |
|-----------------------|-------|
| Adjust with Body Coil | Off   |
| Confirm Frequency     | Never |
| Assume Silicone       | Off   |

**System - Adjust Volume**

|             |                    |
|-------------|--------------------|
| Position    | R0.8 P5.9 H10.6 mm |
| Orientation | T > C-16.5 > S0.6  |
| Rotation    | -1.12 deg          |
| A >> P      | 192 mm             |
| R >> L      | 192 mm             |
| F >> H      | 116 mm             |
| Reset       | Off                |

**System - Tx/Rx**

|                     |                |
|---------------------|----------------|
| Frequency 1H        | 123.256229 MHz |
| ? Ref. Amplitude 1H | 0.000 V        |
| Reset               | Off            |
| Correction Factor   | 1.00           |
| Image Scaling       | 1.000          |

**Physio - Signal**

|                 |           |
|-----------------|-----------|
| 1st Signal/Mode | None      |
| TR              | 2000.0 ms |
| Concatenations  | 1         |

**BOLD**

|                         |        |
|-------------------------|--------|
| GLM Statistics          | Off    |
| Ignore Meas. at Start   | 0      |
| Ignore After Transition | 0      |
| Model Transition States | On     |
| Temp. Highpass Filter   | On     |
| Threshold               | 2.50   |
| Paradigm Size           | 66     |
| Meas[1]                 | Active |
| Meas[2]                 | Active |
| Meas[3]                 | Active |
| Meas[4]                 | Active |
| Meas[5]                 | Active |
| Meas[6]                 | Active |
| Meas[7]                 | Active |
| Meas[8]                 | Active |
| Meas[9]                 | Active |
| Meas[10]                | Active |
| Meas[11]                | Active |
| Meas[12]                | Active |
| Meas[13]                | Active |
| Meas[14]                | Active |
| Meas[15]                | Active |
| Meas[16]                | Active |
| Meas[17]                | Active |
| Meas[18]                | Active |
| Meas[19]                | Active |
| Meas[20]                | Active |
| Meas[21]                | Active |
| Meas[22]                | Active |
| Meas[23]                | Ignore |
| Meas[24]                | Ignore |
| Meas[25]                | Ignore |
| Meas[26]                | Ignore |
| Meas[27]                | Ignore |
| Meas[28]                | Ignore |
| Meas[29]                | Ignore |
| Meas[30]                | Ignore |
| Meas[31]                | Ignore |

**BOLD**

|                   |         |
|-------------------|---------|
| Meas[32]          | Ignore  |
| Meas[33]          | Ignore  |
| Meas[34]          | Ignore  |
| Meas[35]          | Ignore  |
| Meas[36]          | Ignore  |
| Meas[37]          | Ignore  |
| Meas[38]          | Ignore  |
| Meas[39]          | Ignore  |
| Meas[40]          | Ignore  |
| Meas[41]          | Ignore  |
| Meas[42]          | Ignore  |
| Meas[43]          | Ignore  |
| Meas[44]          | Ignore  |
| Meas[45]          | Active  |
| Meas[46]          | Active  |
| Meas[47]          | Active  |
| Meas[48]          | Active  |
| Meas[49]          | Active  |
| Meas[50]          | Active  |
| Meas[51]          | Active  |
| Meas[52]          | Active  |
| Meas[53]          | Active  |
| Meas[54]          | Active  |
| Meas[55]          | Active  |
| Meas[56]          | Active  |
| Meas[57]          | Active  |
| Meas[58]          | Active  |
| Meas[59]          | Active  |
| Meas[60]          | Active  |
| Meas[61]          | Active  |
| Meas[62]          | Active  |
| Meas[63]          | Active  |
| Meas[64]          | Active  |
| Meas[65]          | Active  |
| Meas[66]          | Active  |
| Motion Correction | On      |
| Spatial Filter    | On      |
| Filter Width      | 4.0 mm  |
| Measurements      | 200     |
| Delay in TR       | 0.00 ms |

**Sequence - Part 1**

|                   |            |
|-------------------|------------|
| Sequence Name     | epfid      |
| Excitation        | Standard   |
| RF Pulse Type     | Normal     |
| Gradient Mode     | Fast*      |
| Bandwidth         | 2368 Hz/Px |
| Echo Spacing      | 0.53 ms    |
| Free Echo Spacing | Off        |
| EPI Factor        | 64         |

**Sequence - Part 2**

|              |     |
|--------------|-----|
| Introduction | Off |
|--------------|-----|

\\NRA\Schädel\_32ch\lschämie\CRPPstroke20191228\_32ch\_New\_Patients6-1t1mprage\_tra\_HighRes\_ Nch\_32ch \*

TA: 8:14 min Coil Selection: Auto Voxel Size: 0.8×0.8×1.0 mm<sup>3</sup> Acc.: 2 Rel. SNR: 1.00

### Properties

|                                               |                    |
|-----------------------------------------------|--------------------|
| Start measurement without further preparation | On                 |
| Wait for User to Start                        | Off                |
| Start measurements                            | Single Measurement |
| Prio Recon                                    | Off                |
| Auto Open Inline Display                      | Off                |
| Auto Close Inline Display                     | Off                |
| Load Images to MR View&GO                     | On                 |
| Auto Store Images                             | On                 |
| Load Images to Stamp Segments                 | Off                |
| Load Images to Graphic Segments               | Off                |
| Graphic segment                               | Default            |
| Inline Movie                                  | Off                |

### Routine

|                     |                    |
|---------------------|--------------------|
| Slab Group          | 1                  |
| Slabs               | 1                  |
| Distance Factor     | 50 %               |
| Position            | L0.0 P1.6 H13.6 mm |
| Orientation         | Transversal        |
| Phase Encoding Dir. | R >> L             |
| Slices per Slab     | 176                |
| Phase Oversampling  | 10 %               |
| Slice Oversampling  | 27.3 %             |
| FoV Read            | 230 mm             |
| FoV Phase           | 100.0 %            |
| Slice Thickness     | 1.0 mm             |
| TR                  | 2200.0 ms          |
| TE                  | 5.17 ms            |
| Averages            | 1                  |
| Concatenations      | 1                  |
| AutoAlign           | Head > Brain       |
| Coil Elements       | HEA;HEP            |

### Contrast - Common

|                    |             |
|--------------------|-------------|
| TR                 | 2200.0 ms   |
| TE                 | 5.17 ms     |
| Magn. Preparation  | Non-sel. IR |
| TI                 | 900 ms      |
| Flip Angle         | 8 deg       |
| Fat-Water Contrast | Standard    |
| Dark Blood         | Off         |
| Reconstruction     | Magnitude   |

### Contrast - Dynamic

|                 |                  |
|-----------------|------------------|
| Dynamic Mode    | Standard         |
| Measurements    | 1                |
| Multiple Series | Each Measurement |
| Reordering      | Linear Rot.      |

### Resolution - Common

|                  |         |
|------------------|---------|
| FoV Read         | 230 mm  |
| FoV Phase        | 100.0 % |
| Slice Thickness  | 1.0 mm  |
| Base Resolution  | 288     |
| Phase Resolution | 100 %   |
| Slice Resolution | 100 %   |
| Interpolation    | Off     |

### Resolution - Acceleration

|                        |            |
|------------------------|------------|
| Acceleration mode      | GRAPPA     |
| Reference Scans        | Integrated |
| Acceleration Factor PE | 2          |
| Reference Lines PE     | 24         |
| Acceleration Factor 3D | 1          |
| Phase Partial Fourier  | Off        |
| Slice Partial Fourier  | Off        |
| Asymmetric Echo        | Allowed    |
| Elliptical Scanning    | Off        |

### Resolution - Filter

|                       |         |
|-----------------------|---------|
| Raw Filter            | Off     |
| Elliptical Filter     | Off     |
| Distortion Correction | 3D      |
| Normalize             | Prescan |
| Image Filter          | On      |

### Geometry - Common

|                     |                    |
|---------------------|--------------------|
| Slab Group          | 1                  |
| Slabs               | 1                  |
| Distance Factor     | 50 %               |
| Position            | L0.0 P1.6 H13.6 mm |
| Orientation         | Transversal        |
| Phase Encoding Dir. | R >> L             |
| Slices per Slab     | 176                |
| Phase Oversampling  | 10 %               |
| Slice Oversampling  | 27.3 %             |
| FoV Read            | 230 mm             |
| FoV Phase           | 100.0 %            |
| Slice Thickness     | 1.0 mm             |
| TR                  | 2200.0 ms          |
| Multi-Slice Mode    | Single Shot        |
| Series              | Ascending          |
| Concatenations      | 1                  |

### Geometry - AutoAlign

|                     |                    |
|---------------------|--------------------|
| Slab Group          | 1                  |
| Position            | L0.0 P1.6 H13.6 mm |
| Orientation         | Transversal        |
| Phase Encoding Dir. | R >> L             |
| AutoAlign           | Head > Brain       |
| Initial Position    | L0.0 P1.6 H13.6    |
| R                   | 0.0 mm             |
| P                   | 1.6 mm             |
| H                   | 13.6 mm            |
| Initial Orientation | Transversal        |
| Initial Rotation    | 91.66 deg          |

### Geometry - Navigator

### Geometry - Tim Planning Suite

|                   |      |
|-------------------|------|
| Set-n-Go Protocol | Off  |
| Table Position    | 0 mm |
| Table Position    | H    |
| Inline Composing  | Off  |

### System - Miscellaneous

|                |                  |
|----------------|------------------|
| Coil Selection | Auto Coil Select |
| MSMA           | S - C - T        |

**System - Miscellaneous**

|                     |                  |
|---------------------|------------------|
| Sagittal            | R >> L           |
| Coronal             | A >> P           |
| Transversal         | F >> H           |
| Coil Combination    | Adaptive Combine |
| Matrix Optimization | Off              |

**System - Adjustments**

|                       |          |
|-----------------------|----------|
| Adjustment Strategy   | Standard |
| B0 Shim               | Tune up  |
| B1 Shim               | TrueForm |
| Adjustment Tolerance  | Auto     |
| Adjust with Body Coil | Off      |
| Confirm Frequency     | Never    |
| Assume Silicone       | Off      |

**System - Adjust Volume**

|             |             |
|-------------|-------------|
| Position    | Isocenter   |
| Orientation | Transversal |
| Rotation    | 0.00 deg    |
| A >> P      | 263 mm      |
| R >> L      | 350 mm      |
| F >> H      | 350 mm      |
| Reset       | Off         |

**System - Tx/Rx**

|                     |                |
|---------------------|----------------|
| Frequency 1H        | 123.256229 MHz |
| ? Ref. Amplitude 1H | 0.000 V        |
| Reset               | Off            |
| Correction Factor   | 1.00           |
| Image Scaling       | 1.000          |

**Physio - Signal**

|                 |           |
|-----------------|-----------|
| 1st Signal/Mode | None      |
| TR              | 2200.0 ms |
| Concatenations  | 1         |

**Physio - Cardiac**

|                    |             |
|--------------------|-------------|
| Fat-Water Contrast | Standard    |
| Magn. Preparation  | Non-sel. IR |
| TI                 | 900 ms      |
| Dark Blood         | Off         |
| FoV Read           | 230 mm      |
| FoV Phase          | 100.0 %     |
| Phase Resolution   | 100 %       |
| Dynamic Mode       | Standard    |

**Physio - PACE**

|                |     |
|----------------|-----|
| Resp. Control  | Off |
| Concatenations | 1   |

**Inline - Subtraction**

|                      |     |
|----------------------|-----|
| Subtract             | Off |
| Measurements         | 1   |
| StdDev               | Off |
| Save Original Images | On  |

**Inline - Cardiac**

|                      |             |
|----------------------|-------------|
| Magn. Preparation    | Non-sel. IR |
| Save Original Images | On          |
| TE                   | 5.17 ms     |
| TR                   | 2200.0 ms   |

**Inline - MIP**

|                      |     |
|----------------------|-----|
| MIP Sag              | Off |
| MIP Cor              | Off |
| MIP Tra              | Off |
| MIP Time             | Off |
| Radial MIP           | Off |
| Save Original Images | On  |
| MPR Sag              | Off |
| MPR Cor              | Off |
| MPR Tra              | Off |

**Inline - Composing**

|                  |     |
|------------------|-----|
| Inline Composing | Off |
|------------------|-----|

**Sequence - Part 1**

|                   |             |
|-------------------|-------------|
| Sequence Name     | tfl_r       |
| Dimension         | 3D          |
| Excitation        | Slab-sel.   |
| RF Pulse Type     | Fast        |
| Gradient Mode     | Normal      |
| Flow Compensation | On          |
| Reordering        | Linear Rot. |
| Bandwidth         | 250 Hz/Px   |
| Echo Spacing      | 10.18 ms    |
| Asymmetric Echo   | Allowed     |
| Turbo Factor      | 317         |

**Sequence - Part 2**

|                         |    |
|-------------------------|----|
| Introduction            | On |
| RF Spoiling             | On |
| Incr. Gradient Spoiling | On |

**Sequence - Assistant**

|               |     |
|---------------|-----|
| SAR Assistant | Off |
|---------------|-----|
